# Supplementary material for: The dynamic relationships between the three events that release individual Na+ ions from the Na+/K+-ATPase
Source: PubMed Central journal article supplement — Nat Commun. 2012 Feb 14;3:669–. doi: 10.1038/ncomms1673 (PMC3293407; doi:10.1038/ncomms1673), 2012-02-14
Supplement: ncomms1673-s1.pdf [file ncomms1673-s1.pdf]

**The dynamic relationships between the three events that release individual Na<sup>+</sup> ions from the Na<sup>+</sup>/K<sup>+</sup>-ATPase.**

Gadsby, Bezanilla, Rakowski, De Weer & Holmgren

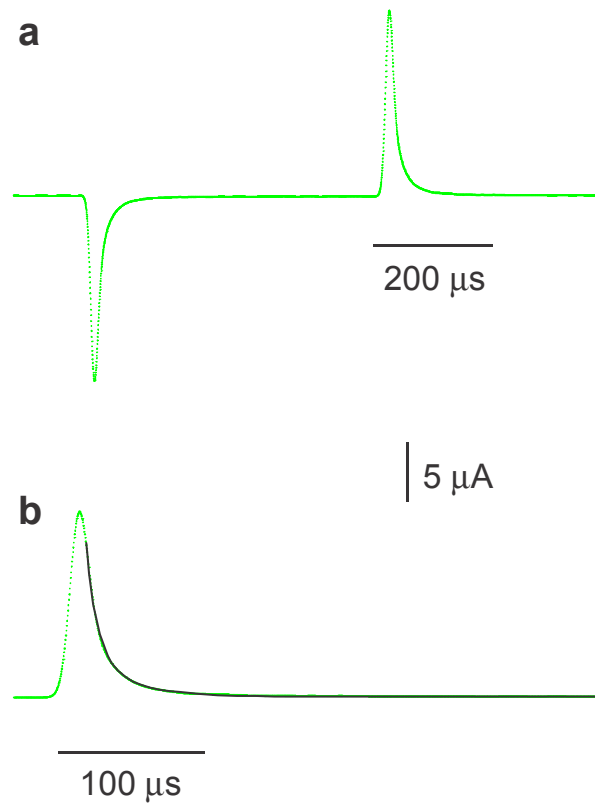

**Supplementary Figure S1. Speed of squid giant axon membrane voltage clamp.** (a) Capacitance current transient from a representative axon in response to a 4 mV voltage step made after H<sub>2</sub>DTG had been applied. (b) OFF membrane capacitance transient. The solid line represents a two-exponential fit to the current decay: the super-fast component, with a time constant of  $7.46 \pm 0.05 \mu\text{s}$ , was followed by a slower decay with  $28.0 \pm 0.3 \mu\text{s}$  time constant. All axons studied had similarly fast membrane capacitance transients.

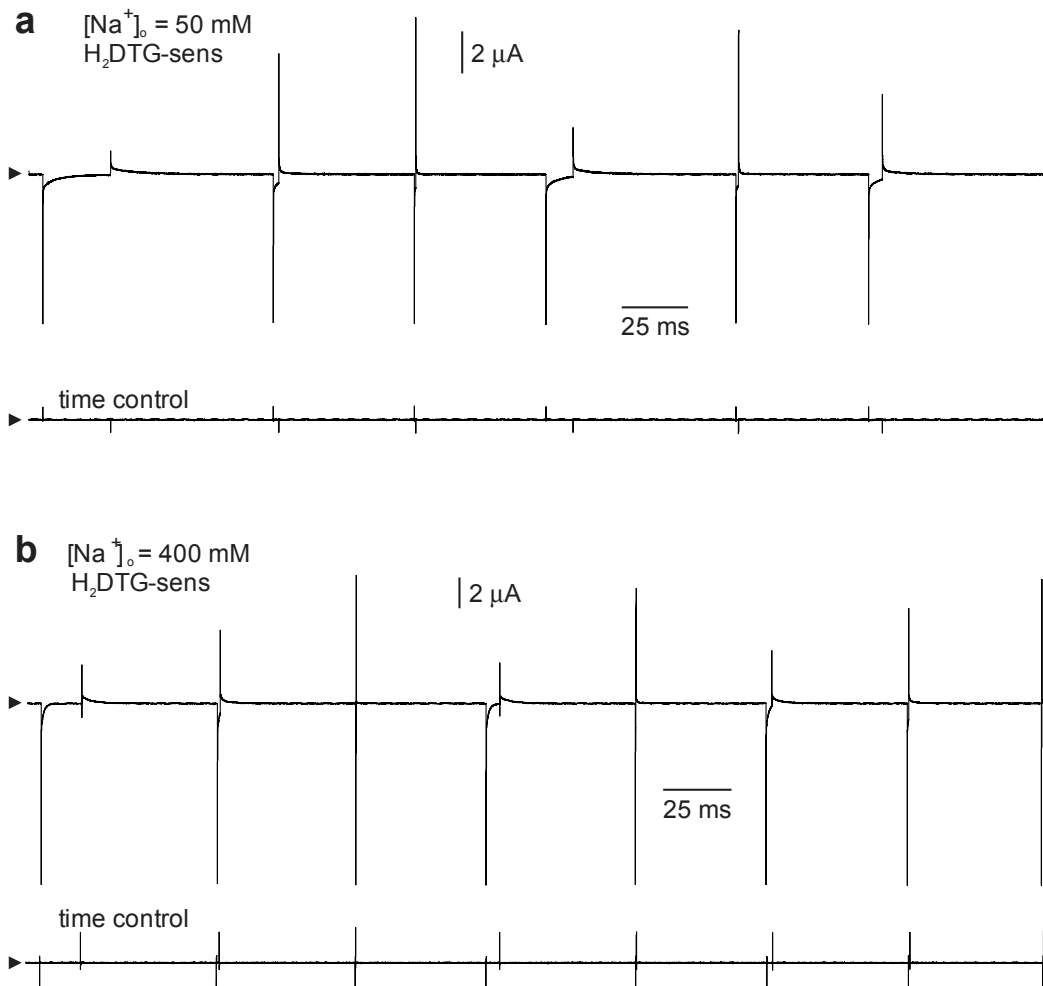

**Supplementary Figure S2. H<sub>2</sub>DTG-sensitive currents.** H<sub>2</sub>DTG-sensitive current traces, and corresponding time controls, from the experiments summarized in Figure 5 with  $[\text{Na}^+]_o=50 \text{ mM}$  (**a**), and  $[\text{Na}^+]_o=400 \text{ mM}$  (**b**). Time control error signals were consistently slightly larger at higher  $[\text{Na}^+]_o$ . These signals were assessed before application of H<sub>2</sub>DTG and likely reflect small changes in membrane capacitance current over time, perhaps due to changes in series resistance within the Frankenhäuser-Hodgkin space<sup>22</sup>. In any case, they last only ~20-40  $\mu\text{s}$  and represent <10% of the maximum  $Q_f$ ; all values of  $Q_f$  were corrected for these errors.

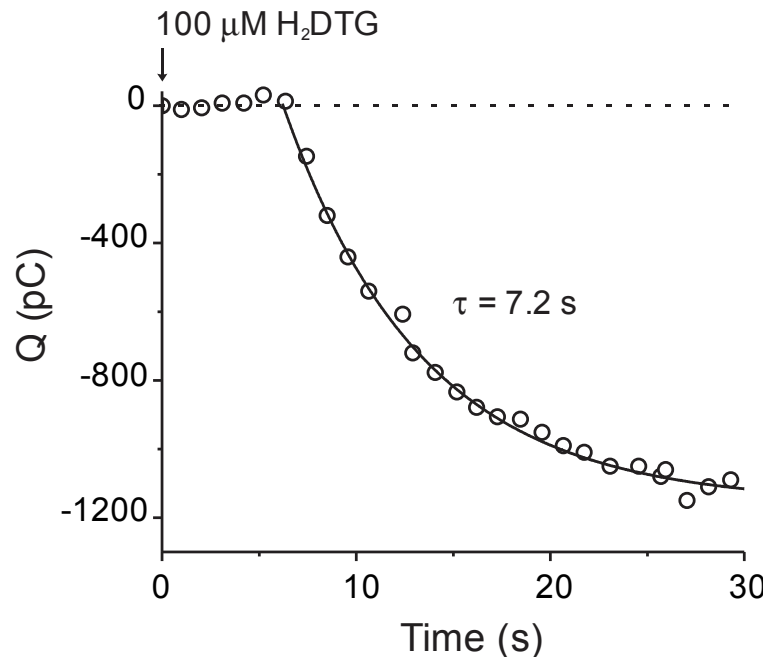

**Supplementary Figure S3. H<sub>2</sub>DTG action.** Charge moved by the Na<sup>+</sup>/K<sup>+</sup> pump was estimated by numerical integration of H<sub>2</sub>DTG-sensitive currents in response to a 5 ms voltage step to -140 mV, from a holding potential of 0 mV, applied every ~1 s. H<sub>2</sub>DTG (valve switched at arrow) takes ~6 s to reach the axon. The solid line represents a single exponential fit to the time course of H<sub>2</sub>DTG-induced loss of charge. From 4 experiments, the mean  $\tau$  for 100  $\mu$ M H<sub>2</sub>DTG action was  $6.7 \pm 0.3$  s. Two additional experiments using 50  $\mu$ M H<sub>2</sub>DTG gave similar results ( $\tau = 7.5 \pm 0.1$  s).
